# Supplementary material for: Organising for innovation in regional innovation systems: from fragmented innovation ecosystems to the joint aim for competitiveness of offshore wind energy
Source: Springer Nature journal article supplement (doi:10.1186/s40604-017-0044-2), 2017-02-24
Supplement: MOESM1 [file 12091668]

## Multilingual abstracts

### Arabic

#### **Organising for innovation in regional innovation systems: From fragmented innovation ecosystems to the joint aim for competitiveness of offshore wind energy**

**Tove Brink**

**التنظيم للابتكار في أنظمة الابتكار الإقليمية: من النظام الإيكولوجي المجزئ للابتكار إلى الهدف المشترك للقدرة التنافسية لطاقة الرياح البحرية**

يكشف البحث في هذه الورقة كيف يمكن تنظيم النظام الإيكولوجي للابتكار من تحقيق هدف الابتكار والقدرة التنافسية. تم إجراء هذا البحث في الفترة الممتدة بين شهري يونيو 2014 ومايو 2015 باستخدام المنهجية النوعية الإستنتاجية على عملة الصيانة في حدائق الرياح البحرية. يحتوي البحث على إجراء مقابلة مع فريق من 11 شركة و20 مقابلة فردية وحلقة دراسية أولية مع 60 مشاركاً عن النتائج التي توصلنا إليها. تبين النتائج أن إطار المراوح الثلاثة مفيد للنظام الإيكولوجي لرياح البحرية عبر تمكين الابتكار. تبرز النتائج الحاجة إلى التقارب المرن بين الأنظمة الوطنية والإجراءات والمراوح حول حسن التوقيت والشفافية وممارسات التعاون المفتوحة. بالإضافة إلى ذلك، يمكن للتعاون مع المؤسسات المتوسطة والصغرى من أن يخلق معرفة ديناميكية متكاملة بالاشتراك مع البحث الجامعي والتدريب التعليمي. وقع تقديم مساهمة لتطبيق مفهوم المراوح الثلاثة لتمكين الابتكار في النظم الإيكولوجية للرياح البحرية.
